# Supplementary material
Source: Royal Society of Chemistry journal article supplement (doi:10.1039/d6dt00513f)
Supplement: d6dt00513f1.pdf [file d6dt00513f1.pdf]

## Supporting Information

### Chemical Synthesis of Zr-/Ce-/Sm-containing Intermetallic Compounds

#### Catalyzing NaBH<sub>4</sub>-assisted Hydrogenation of 4-Nitrophenol

Yasukazu Kobayashi <sup>\*a</sup>, Hiroshi Mizoguchi <sup>b</sup>, Koharu Yamamoto <sup>c</sup>, and Ryo Shoji <sup>c</sup>

- a. *Renewable Energy Research Centre, National Institute of Advanced Industrial Science and Technology, 2-2-9 Machiikedai, Koriyama, Fukushima 963-0298, Japan.      \* Corresponding author, E-mail: [yasu-kobayashi@aist.go.jp](mailto:yasu-kobayashi@aist.go.jp)*
- b. *Research Center for Materials Nanoarchitectonics (MANA), National Institute for Materials Science (NIMS) Tsukuba, Ibaraki 305-0044. Japan.*
- c. *Department of Chemical Science and Engineering, National Institute of Technology, Tokyo College, 1220-2 Kunugida, Hachioji, Tokyo 193-0997, Japan.*

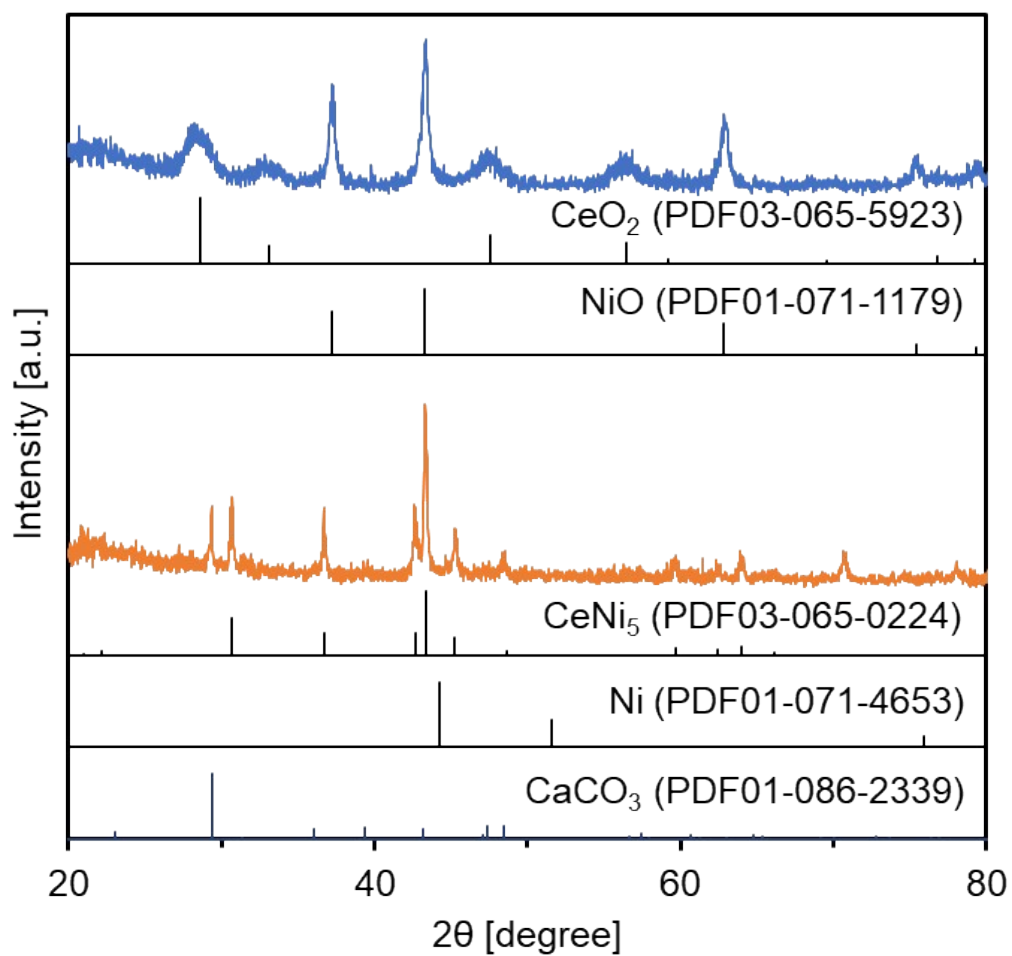

**Fig. S1** XRD patterns for the oxide precursor (blue) and the reduced sample (orange) of  $\text{CeNi}_5$ .

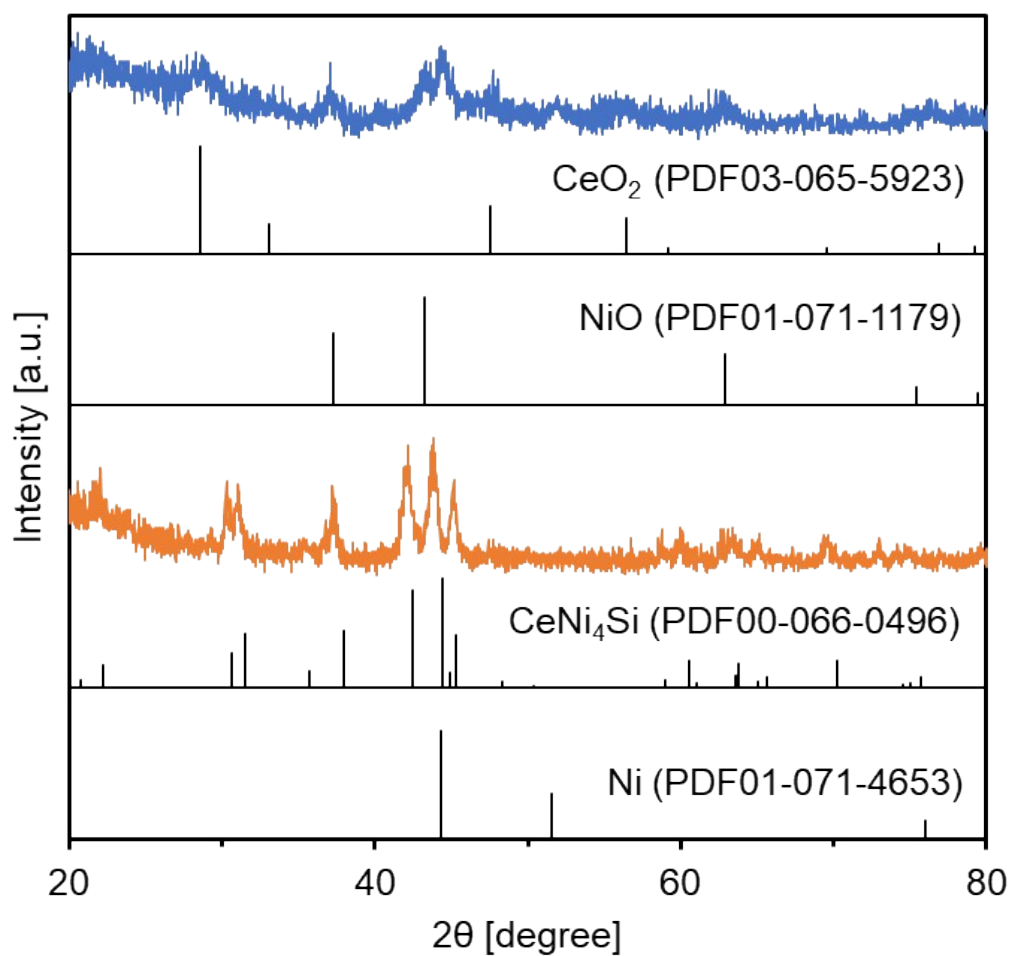

**Fig. S2** XRD patterns for the oxide precursor (blue) and the reduced sample (orange) of CeNi<sub>4</sub>Si.

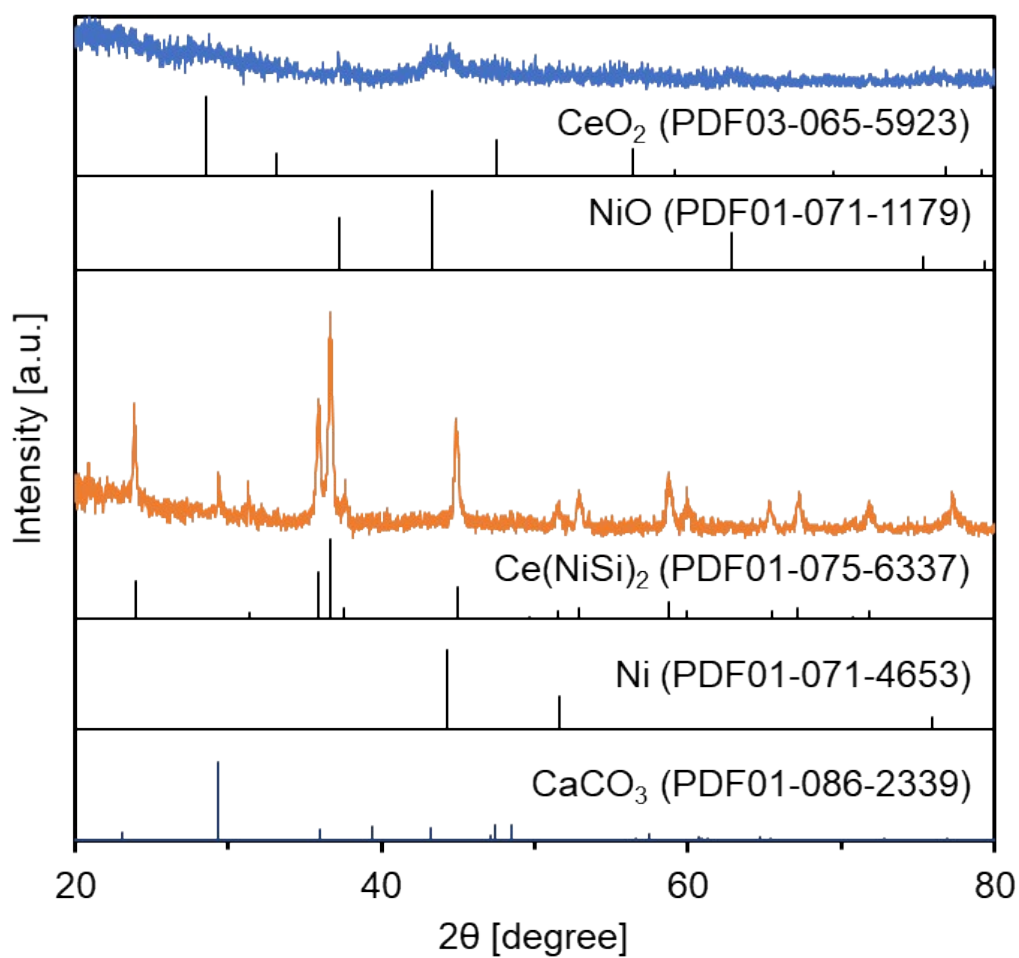

**Fig. S3** XRD patterns for the oxide precursor (blue) and the reduced sample (orange) of  $\text{Ce}(\text{SiNi})_2$ .

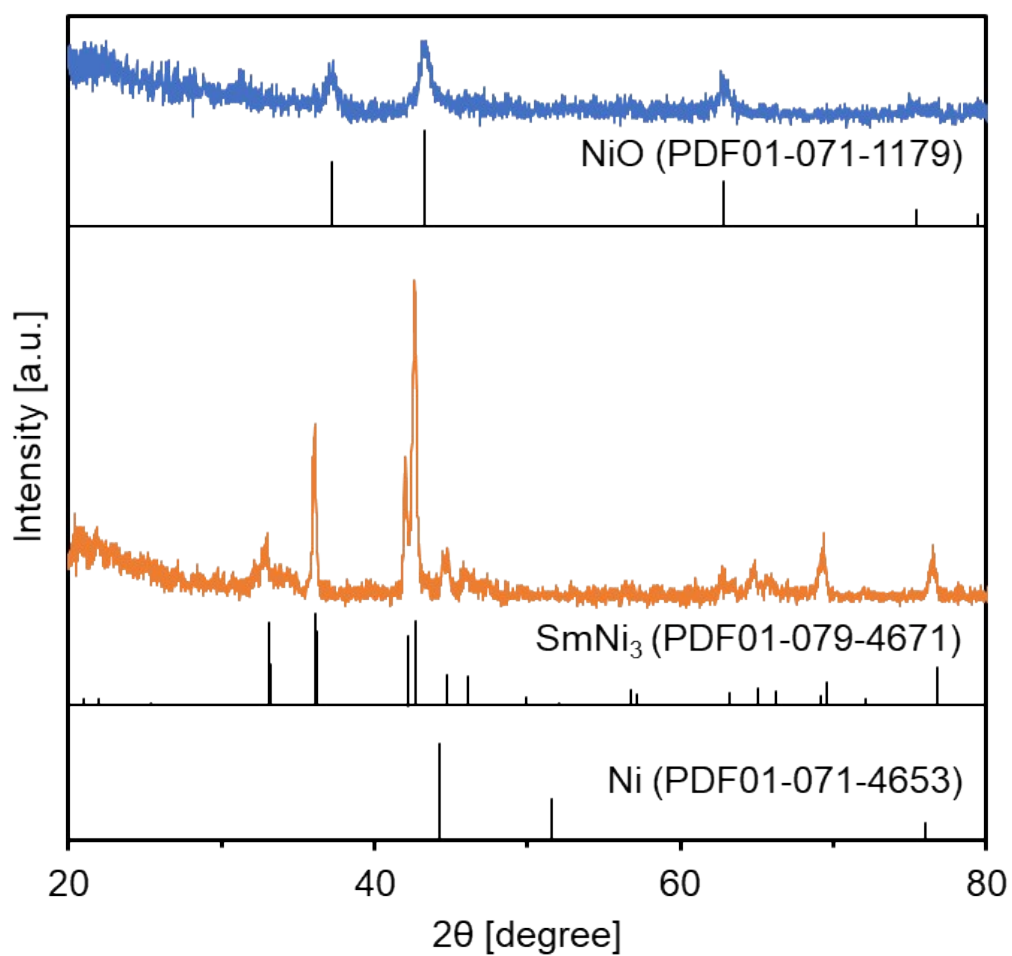

**Fig. S4** XRD patterns for the oxide precursor (blue) and the reduced sample (orange) of SmNi<sub>3</sub>.

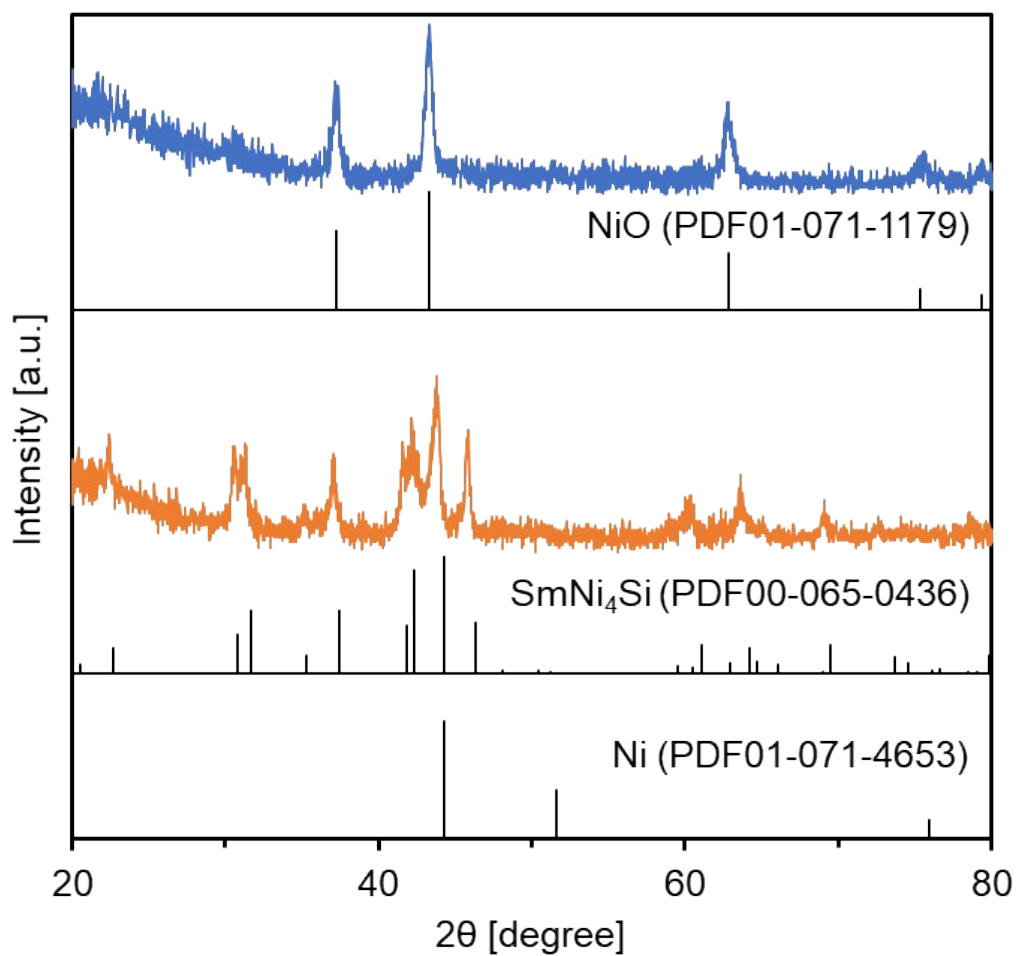

**Fig. S5** XRD patterns for the oxide precursor (blue) and the reduced sample (orange) of SmNi<sub>4</sub>Si.

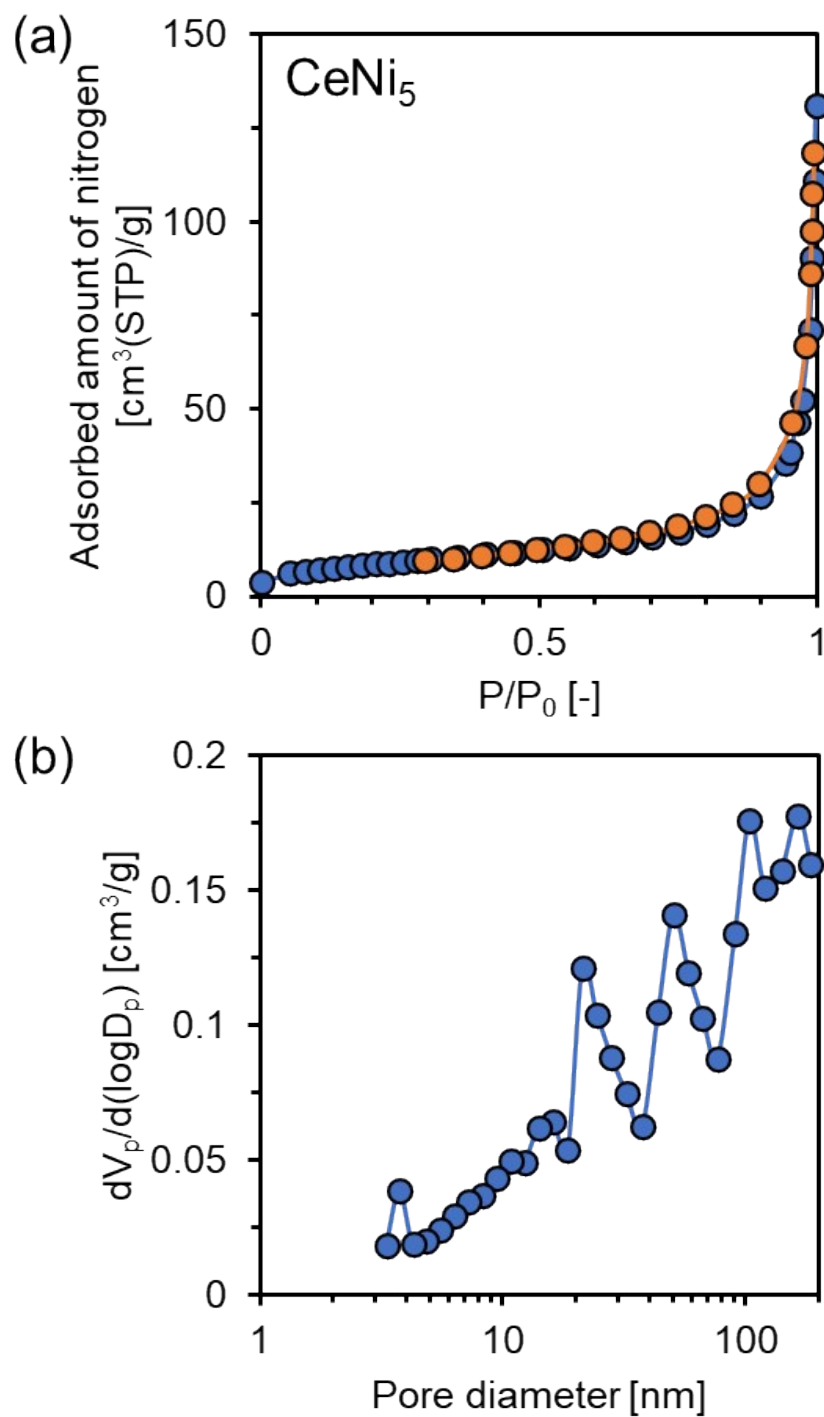

**Fig. S6** (a) Adsorption (blue) and desorption (orange) isotherms of nitrogen, and (b) the corresponding pore size distribution for CeNi<sub>5</sub>.

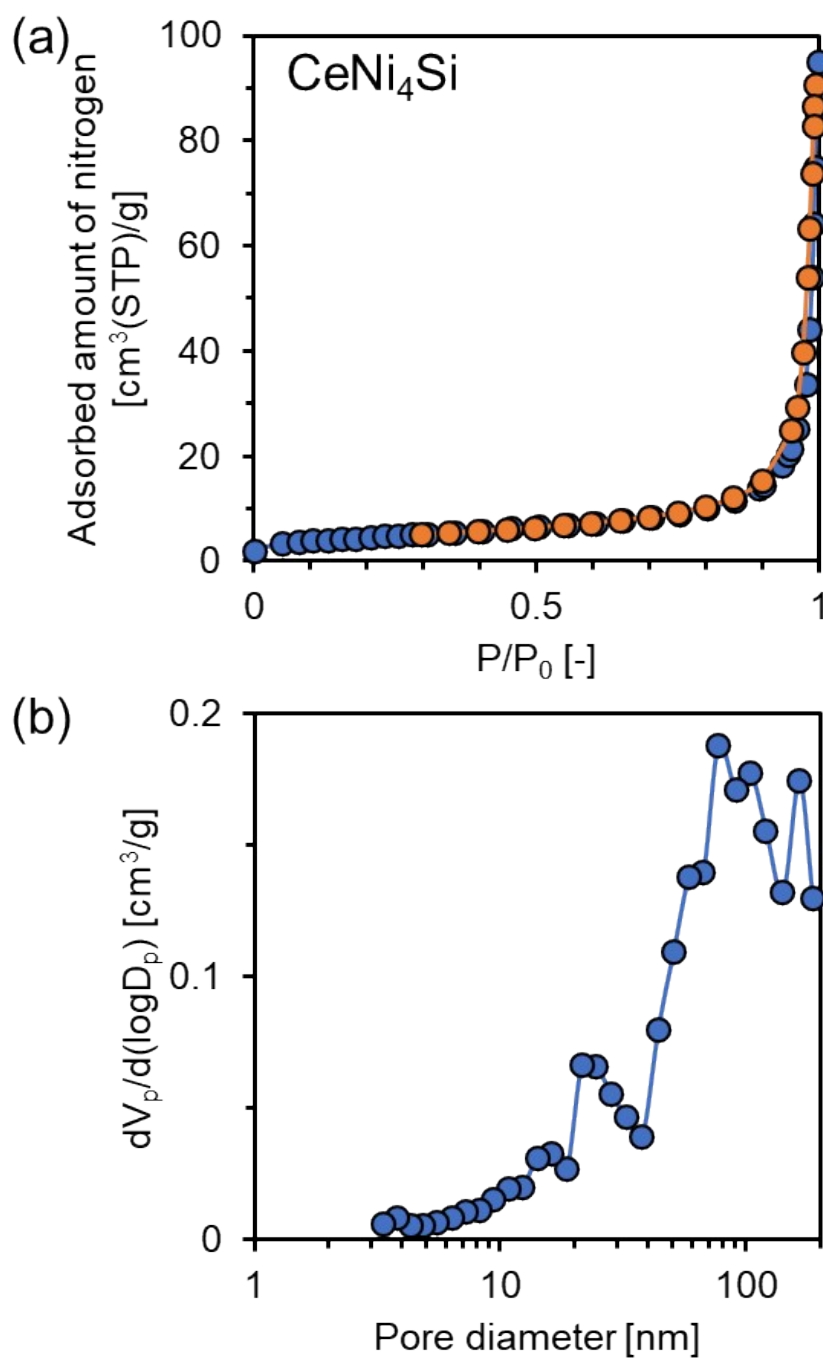

**Fig. S7** (a) Adsorption (blue) and desorption (orange) isotherms of nitrogen, and (b) the corresponding pore size distribution for CeNi<sub>4</sub>Si.

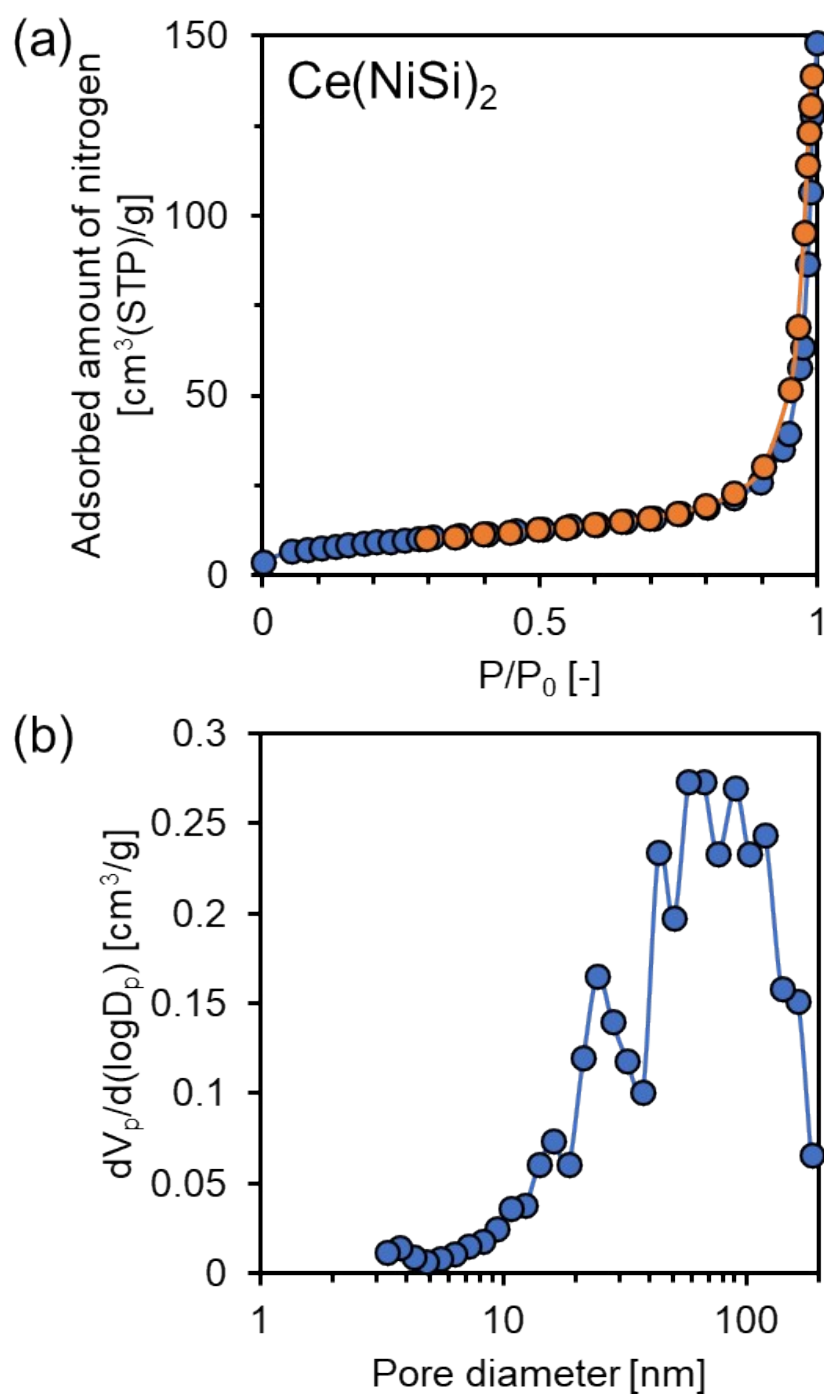

**Fig. S8** (a) Adsorption (blue) and desorption (orange) isotherms of nitrogen, and (b) the corresponding pore size distribution for  $\text{Ce}(\text{NiSi})_2$ .

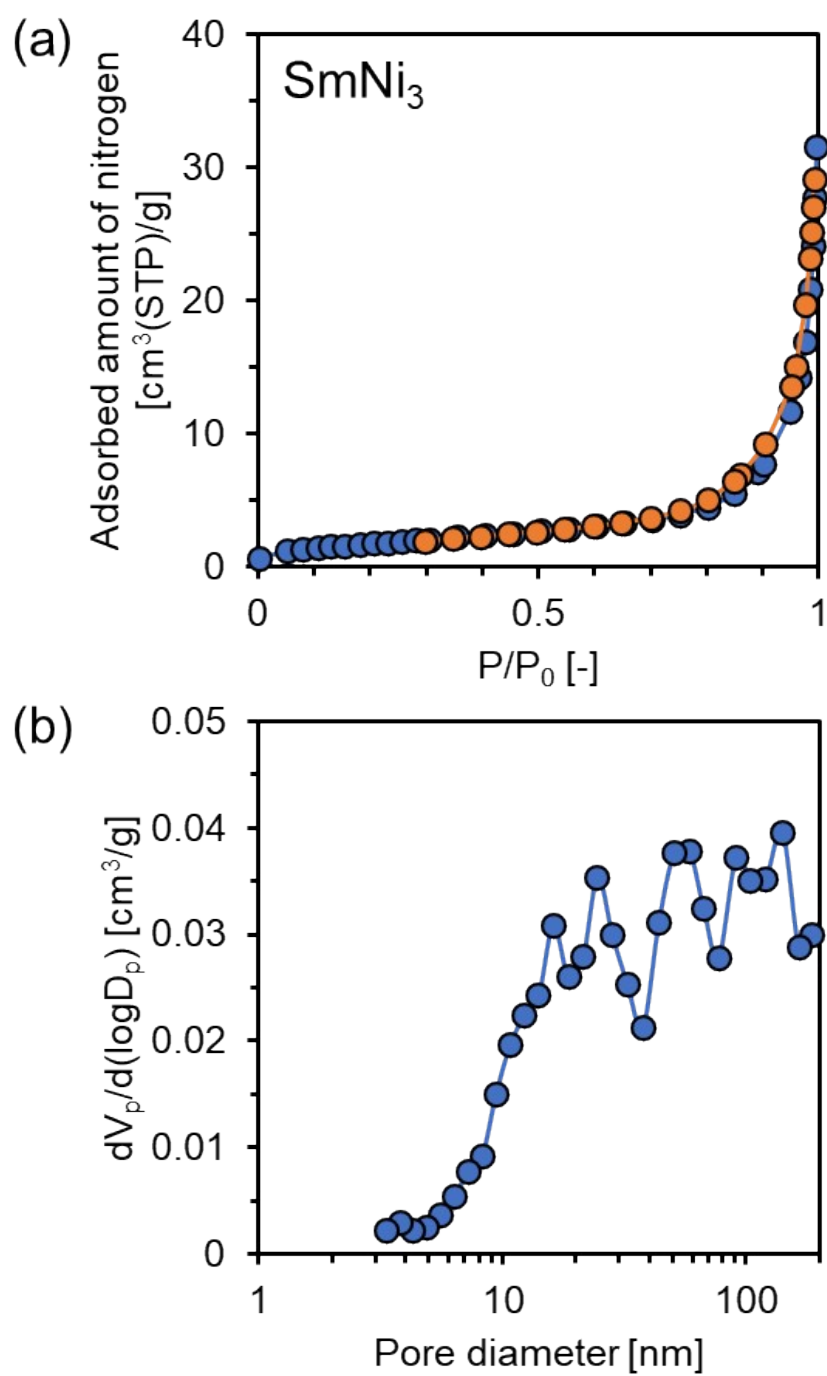

**Fig. S9** (a) Adsorption (blue) and desorption (orange) isotherms of nitrogen, and (b) the corresponding pore size distribution for  $\text{SmNi}_3$ .

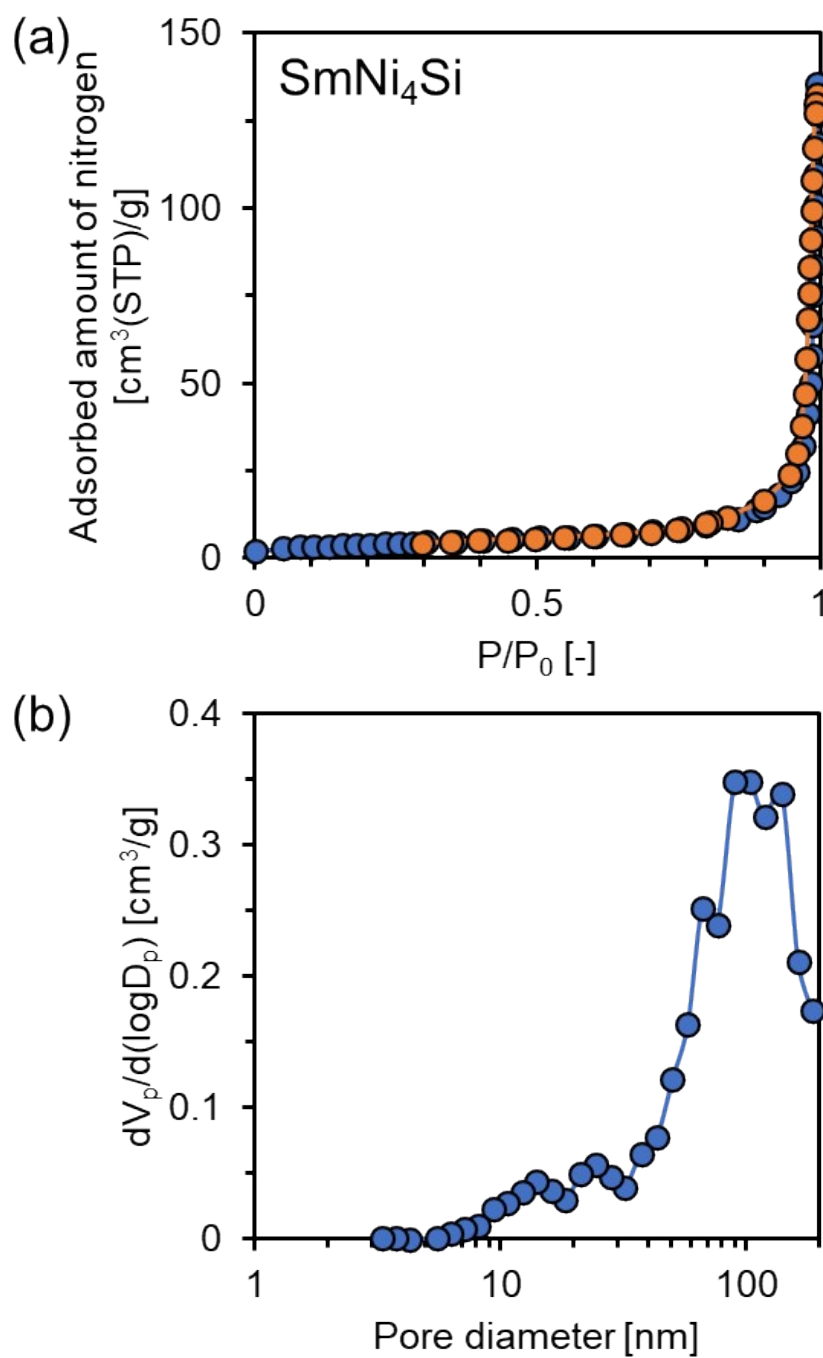

**Fig. S10** (a) Adsorption (blue) and desorption (orange) isotherms of nitrogen, and (b) the corresponding pore size distribution for SmNi<sub>4</sub>Si.

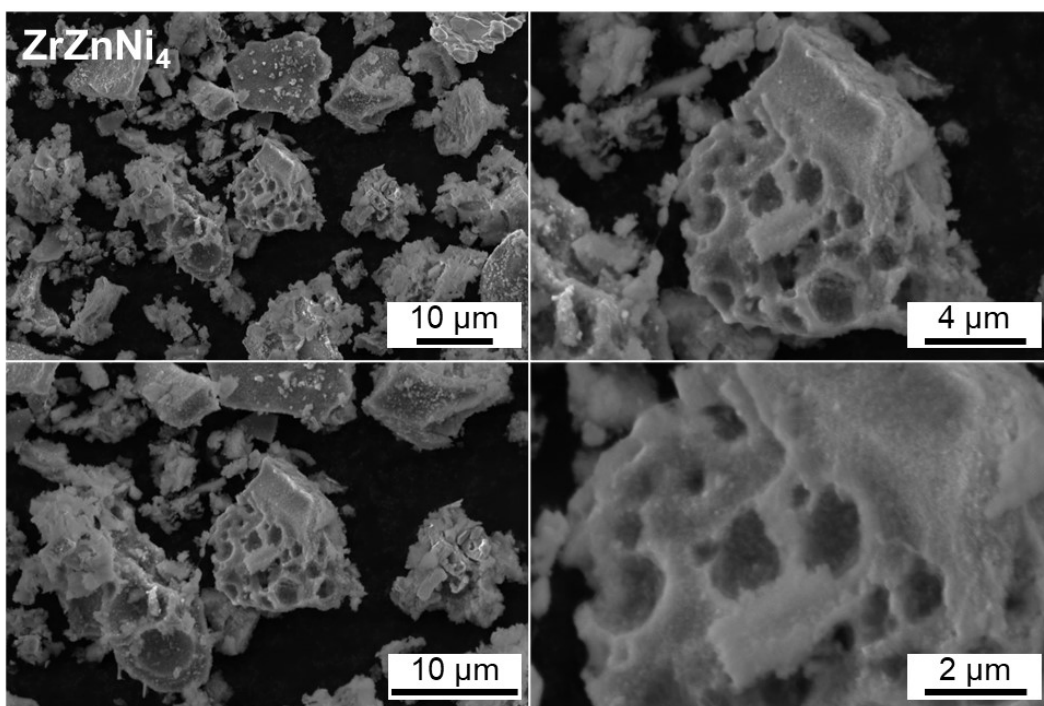

**Fig. S11** SEM images for ZrZnNi<sub>4</sub>.

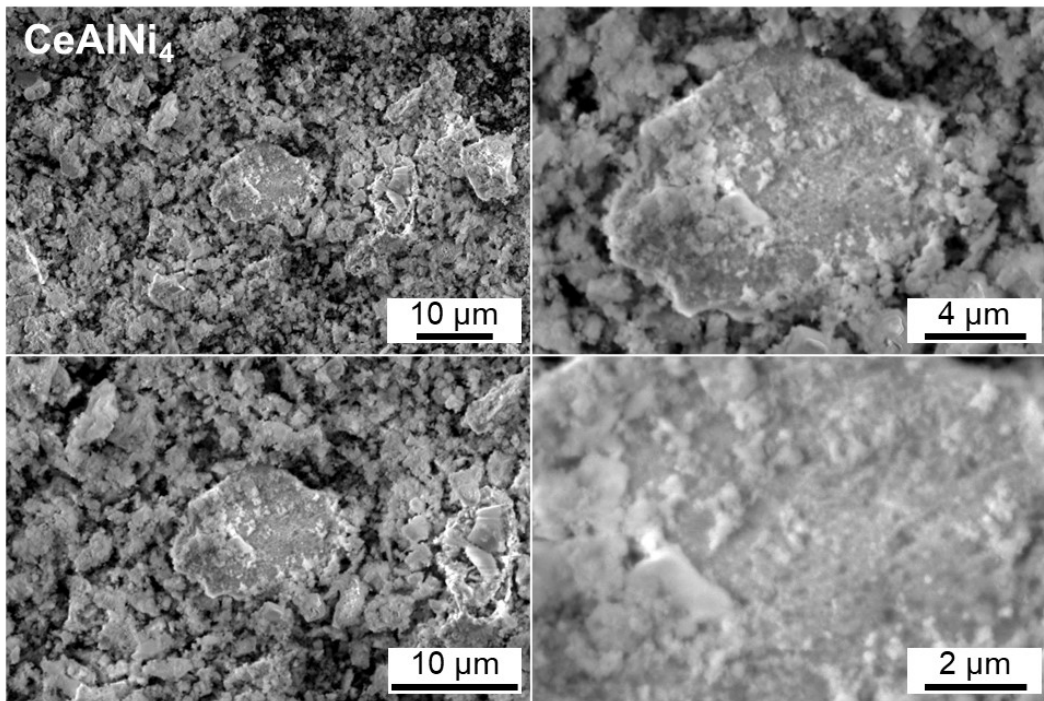

**Fig. S12** SEM images for CeAlNi<sub>4</sub>.

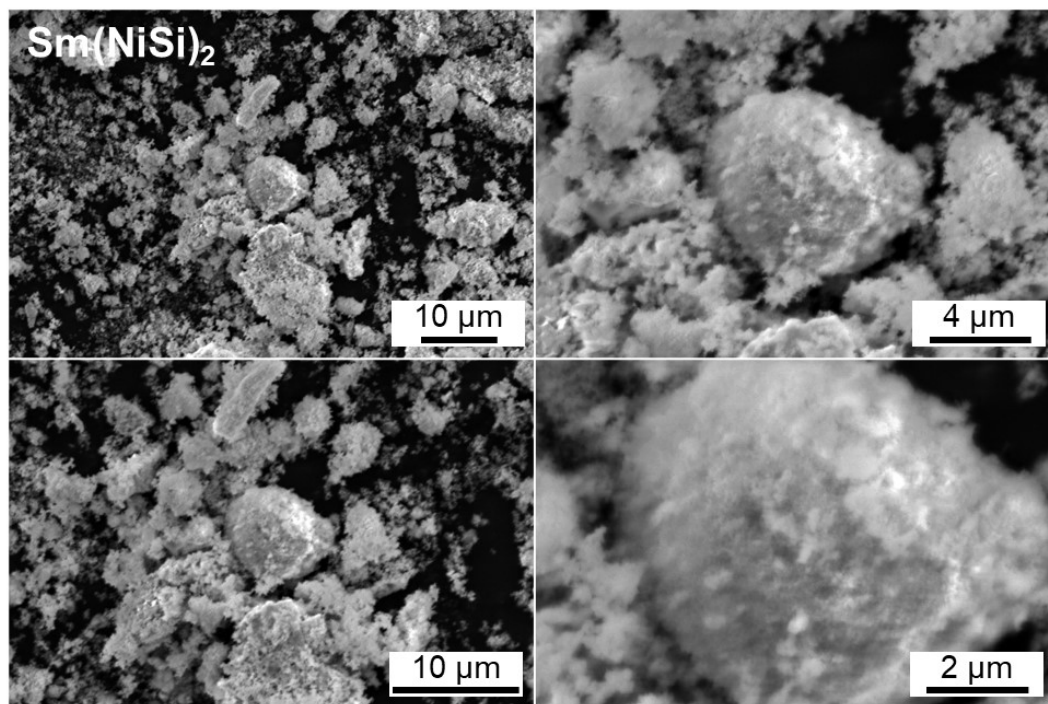

**Fig. S13** SEM images for  $\text{Sm}(\text{NiSi})_2$ .

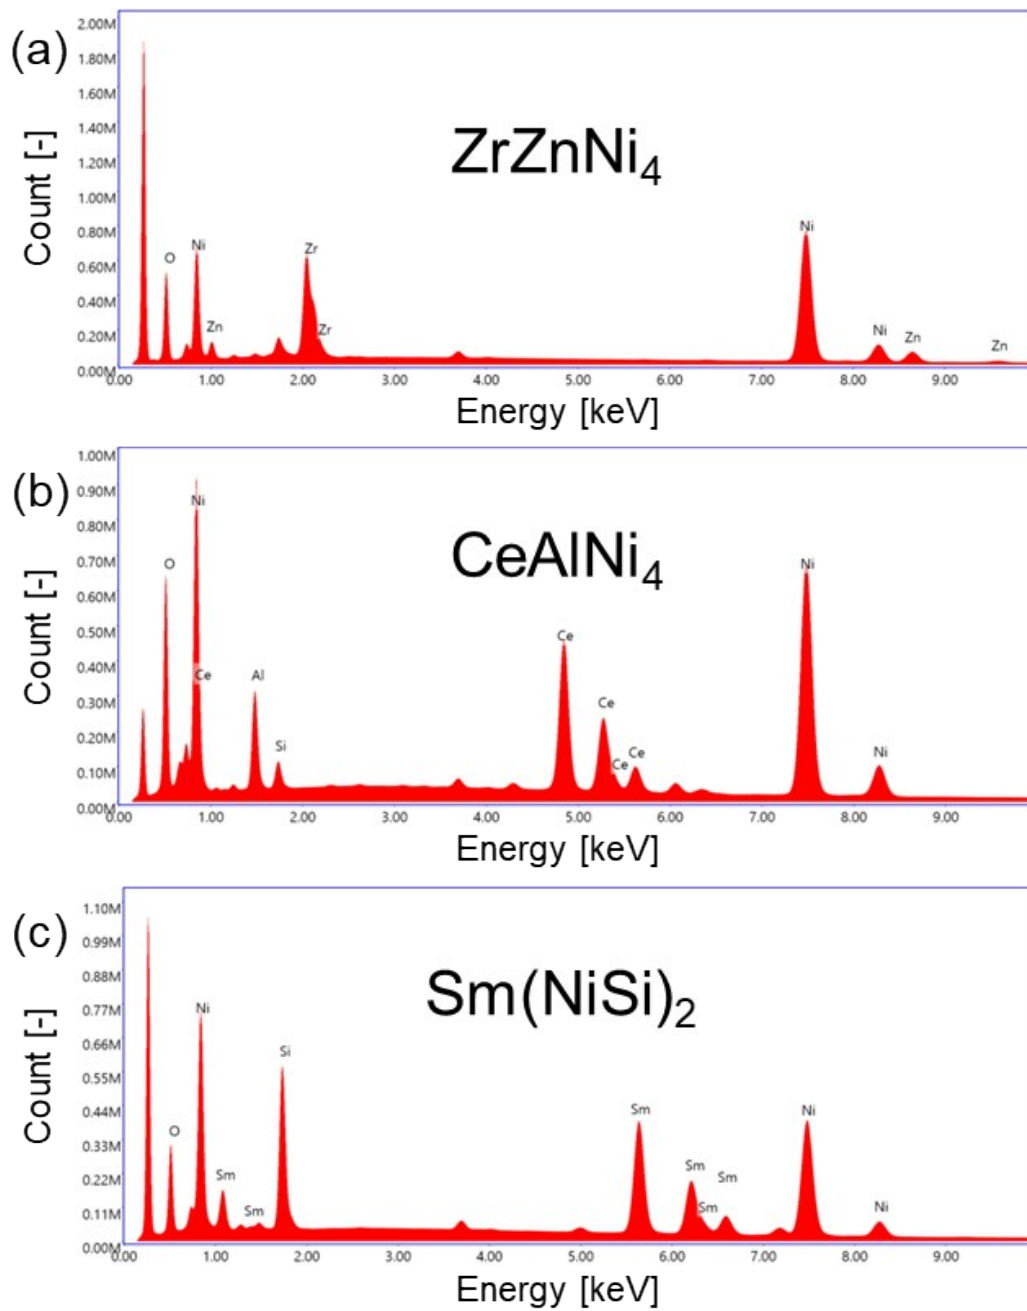

**Fig. S14** EDX spectra obtained in SEM-EDX measurements for (a)  $\text{ZrZnNi}_4$ , (b)  $\text{CeAlNi}_4$ , and (c)  $\text{Sm}(\text{NiSi})_2$ . The corresponding SEM images and elemental mappings are shown in Fig. 4.

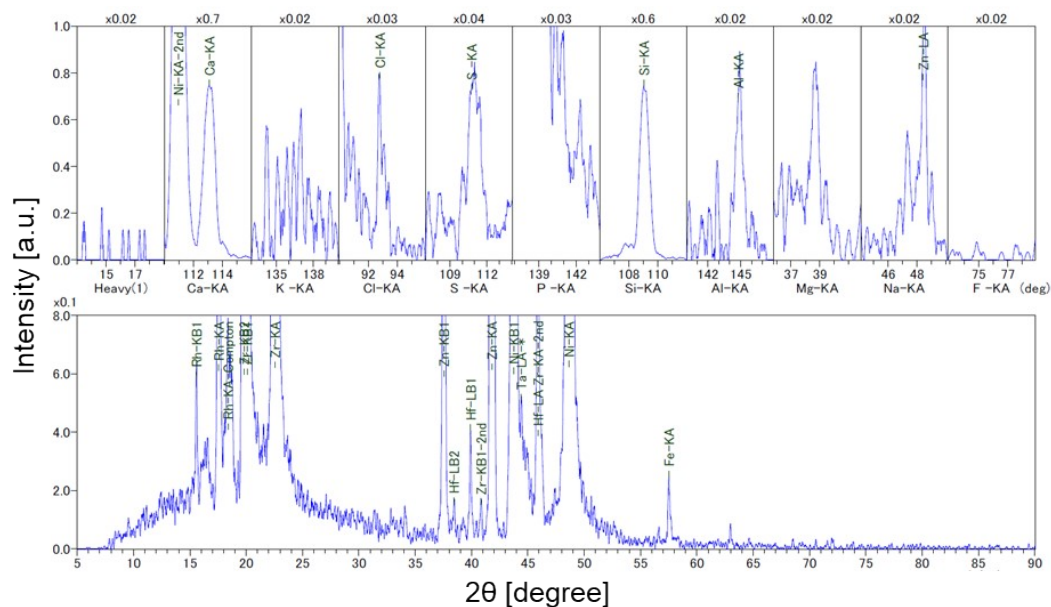

**Fig. S15** XRF spectrum for ZrZnNi<sub>4</sub>.

**Table S1** The weight ratio and molar ratio of all the detected elements and ZrZn/Ni, respectively, in the XRF measurement for ZrZnNi<sub>4</sub>.

| Element | Mass%  | Mol% |
|---------|--------|------|
| Zr      | 29.297 | 22.4 |
| Zn      | 7.409  | 7.9  |
| Ni      | 58.809 | 69.8 |
| Si      | 2.073  | -    |
| Ca      | 1.095  | -    |
| Hf      | 0.983  | -    |
| Cl      | 0.125  | -    |
| Fe      | 0.117  | -    |
| Al      | 0.082  | -    |
| S       | 0.012  | -    |

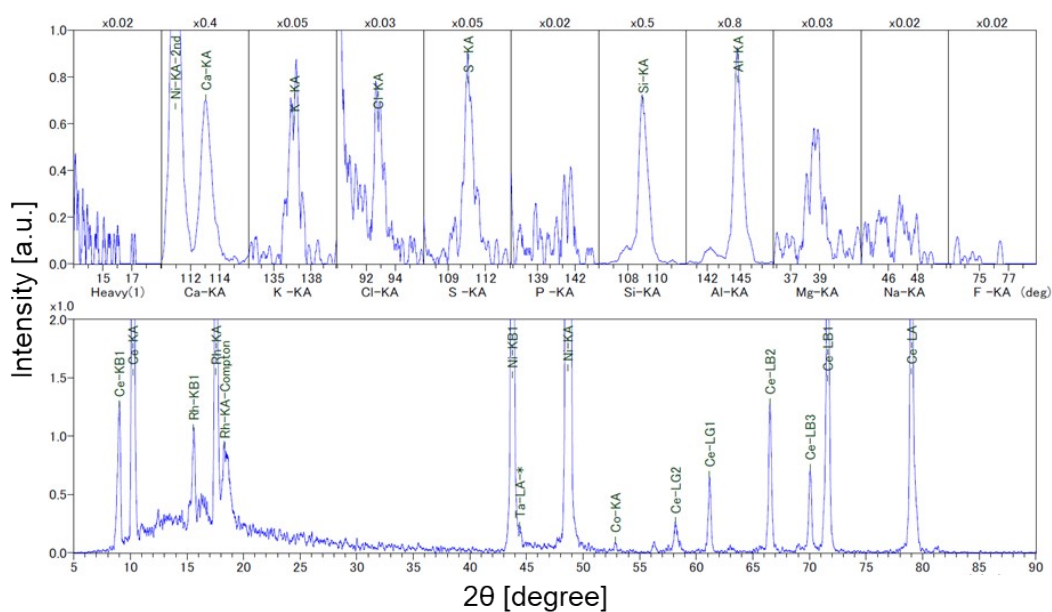

**Fig. S16** XRF spectrum for CeAlNi<sub>4</sub>.

**Table S2** The weight ratio and molar ratio of all the detected elements and Ce/Al/Ni, respectively, in the XRF measurement for CeAlNi<sub>4</sub>.

| Element | Mass%  | Mol% |
|---------|--------|------|
| Ce      | 36.436 | 18.6 |
| Al      | 5.453  | 14.5 |
| Ni      | 54.878 | 66.9 |
| Si      | 2.239  | -    |
| Ca      | 0.612  | -    |
| Cl      | 0.108  | -    |
| Co      | 0.101  | -    |
| K       | 0.089  | -    |
| S       | 0.084  | -    |

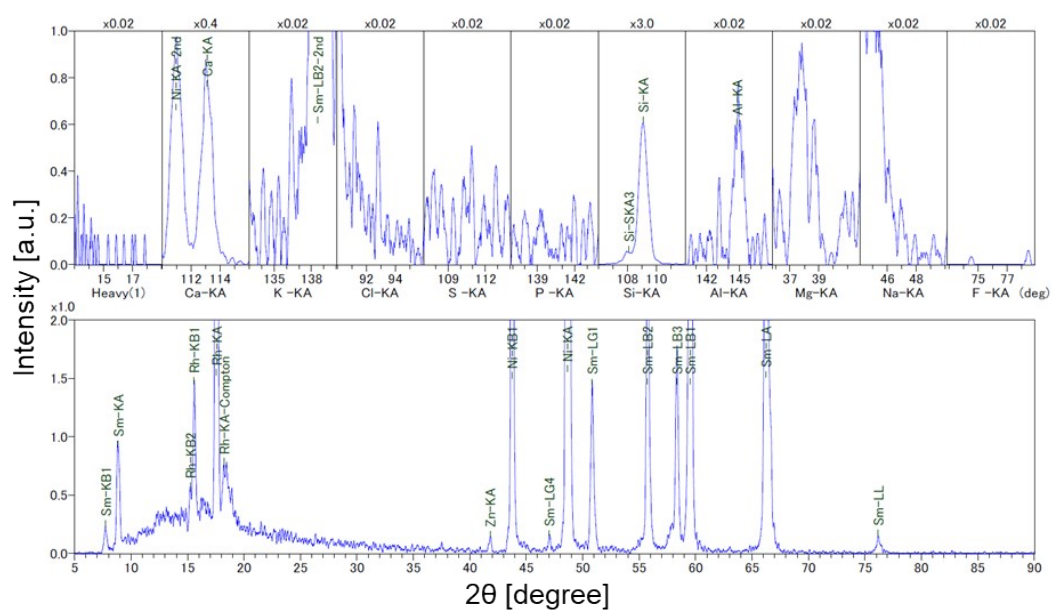

**Fig. S17** XRF spectrum for  $\text{Sm}(\text{NiSi})_2$ .

**Table S3** The weight ratio and molar ratio of all the detected elements and Ce/Al/Ni, respectively, in the XRF measurement for  $\text{Sm}(\text{NiSi})_2$ .

| Element | Mass%  | Mol% |
|---------|--------|------|
| Sm      | 51.306 | 24.8 |
| Ni      | 35.667 | 44.1 |
| Si      | 12.007 | 31.1 |
| Ca      | 0.809  | -    |
| Zn      | 0.119  | -    |
| Al      | 0.093  | -    |

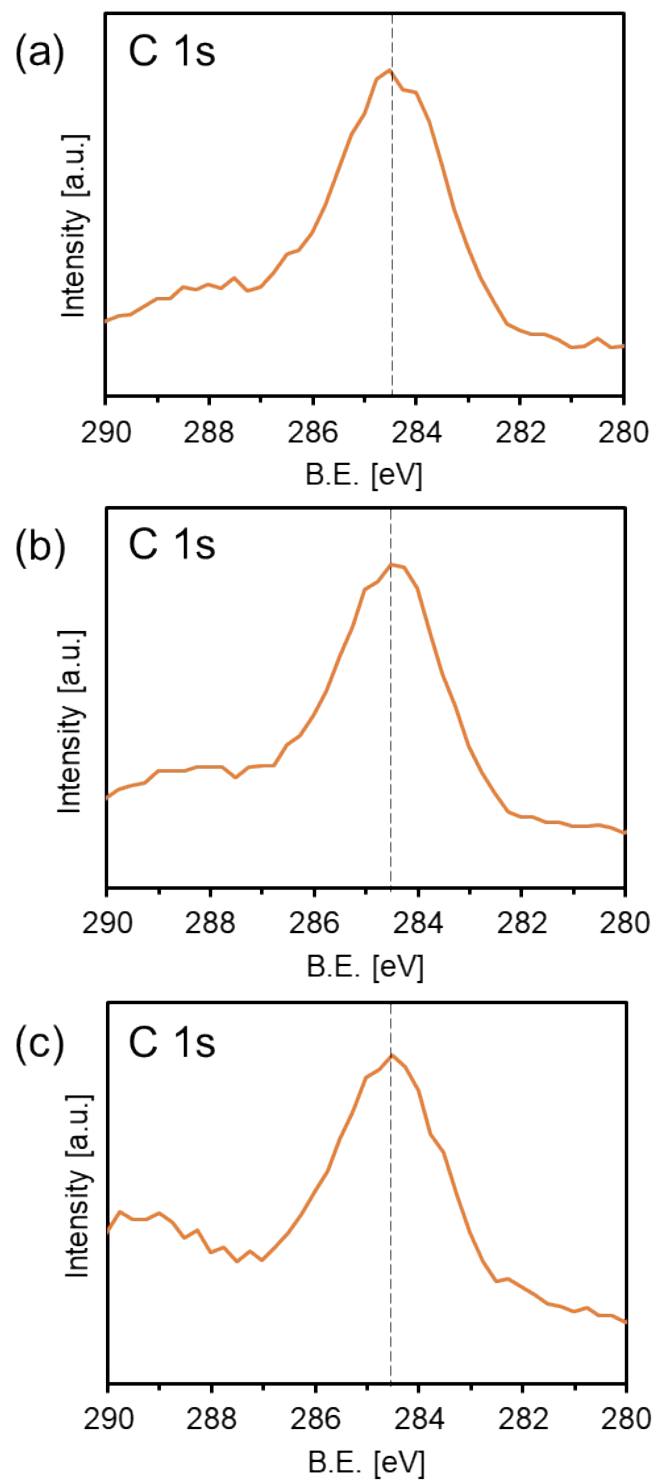

**Fig. S18** XPS spectra of C 1s for (a) ZrZnNi<sub>4</sub>, (b) CeAlNi<sub>4</sub>, and (c) Sm(NiSi)<sub>2</sub>.

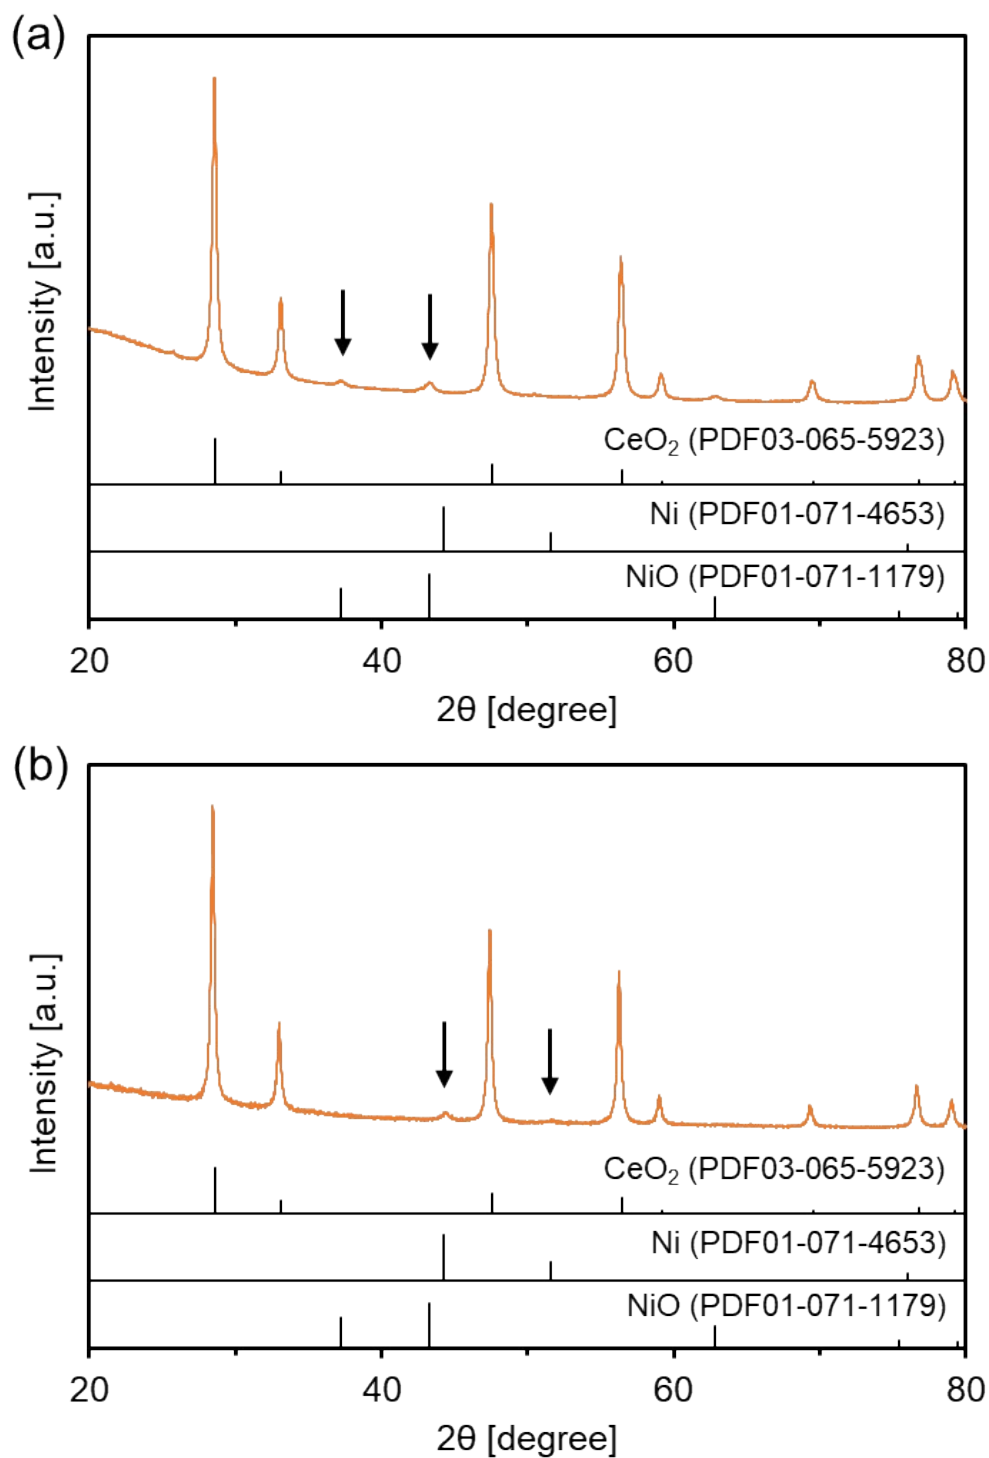

**Fig. S19** XRD patterns for (a) 12wt%NiO/CeO<sub>2</sub> and (b) 10wt%Ni/CeO<sub>2</sub>. Arrows indicates the main peak positions for NiO and Ni, respectively.
